1 **Short title: IPT3 is required for nodulation in *M. truncatula***

2 **Full title: Spatiotemporal cytokinin signaling imaging reveals IPT3 function in nodule**  
3 **development in *Medicago truncatula***

4 **Authors**

5 Paolo M. Triozzi<sup>1</sup>, Thomas B. Irving<sup>2</sup>, Henry W. Schmidt<sup>1</sup>, Zachary P. Keyser<sup>2</sup>, Sanhita  
6 Chakraborty<sup>2</sup>, Kelly M. Balmant<sup>1</sup>, Wendell J. Pereira<sup>1</sup>, Christopher Dervinis<sup>1</sup>, Kirankumar S.  
7 Mysore<sup>3</sup>, Jiangqi Wen<sup>3</sup>, Jean-Michel Ané<sup>2,4</sup>, Matias Kirst<sup>1,5\*</sup> and Daniel Conde<sup>1\*</sup>

8 **Affiliations**

9 <sup>1</sup> School of Forest, Fisheries and Geomatics Sciences, University of Florida, Gainesville, FL  
10 32611, USA.

11 <sup>2</sup> Department of Bacteriology, University of Wisconsin-Madison, Madison, WI 53706, USA.

12 <sup>3</sup> Noble Research Institute, Ardmore, OK 73401, USA.

13 <sup>4</sup> Department of Agronomy, University of Wisconsin-Madison, Madison, WI 53706, USA.

14 <sup>5</sup> Genetics Institute, University of Florida, Gainesville, FL 32611, USA.

15 \* Corresponding authors:

16 Matias Kirst: [mkirst@ufl.edu](mailto:mkirst@ufl.edu)

17 Daniel Conde: [d.conderodriguez@ufl.edu](mailto:d.conderodriguez@ufl.edu)

18 **One-sentence summary:** High-resolution spatiotemporal imaging of cytokinin signaling  
19 reveals IPT3 function during indeterminate nodule development in *Medicago truncatula*

20 **AUTHOR CONTRIBUTIONS**

21 PMT, MK, and DC designed the research; PMT, TBI, ZPK, SC, JMA, MK, and DC designed  
22 the methodology; PMT, HWS, and DC performed the experiments; TBI, ZPK, SC, CD, and  
23 JMA provided material and technical advice. KSM and JW supplied plant material. PMT,  
24 MK, and DC wrote the paper. TBI, HWS, SC, KB, WP, CD, and JMA supervised the data  
25 analyses and reviewed and edited the paper. MK and DC supervised the methodology, data  
26 analyses, and writing-editing the paper.

27

28 **ABSTRACT**

29 Most legumes can establish a symbiotic association with soil rhizobia that triggers the  
30 development of root nodules. These nodules host the rhizobia and allow them to fix nitrogen  
31 efficiently. The perception of bacterial lipo-chitooligosaccharide (LCO) signal in the  
32 epidermis initiates a signaling cascade that allows rhizobial intracellular infection in the root  
33 and de-differentiation and activation of cell division that gives rise to the nodule. Nodule  
34 organogenesis and rhizobial infection need to be coupled in space and time for successful  
35 nodulation. The plant hormone cytokinin (CK) acts as an essential positive regulator of  
36 nodule organogenesis, and specific CK receptors are required for nodule formation. Temporal  
37 regulation of tissue-specific CK signaling and biosynthesis in response to LCOs or  
38 *Sinorhizobium meliloti* inoculation in *Medicago truncatula* remains poorly understood. In the  
39 present study, using a fluorescence-based CK sensor (*TCSn::nls::tGFP*), we performed a  
40 high-resolution tissue-specific temporal characterization of the CK response's sequential  
41 activation during root infection and nodule development in *M. truncatula* after inoculation  
42 with *S. meliloti*. Loss-of-function mutants of the CK-biosynthetic gene *ISOPENTENYL*  
43 *TRANSFERASE 3 (IPT3)* showed impairment of nodulation, suggesting that *IPT3* is required  
44 for nodule development in *M. truncatula*. Simultaneous live imaging of *pIPT3::tdTOMATO*  
45 and the CK sensor showed that *IPT3* induction in the root stele at the base of nodule  
46 primordium contributes to CK biosynthesis, which in turn promotes expression of positive  
47 regulators of nodule organogenesis in *M. truncatula*.

48

49 **Keywords:** Cytokinin, *IPT3*, *Medicago truncatula*, *Sinorhizobium meliloti*, nodule  
50 development, nodule organogenesis, cytokinin sensor, cytokinin signaling, cytokinin  
51 biosynthesis

52

## 53 INTRODUCTION

54 Legume species acquired the capacity to interact symbiotically with rhizobium bacteria to fix  
55 atmospheric dinitrogen, allowing their growth without fertilizers on nitrogen-deprived soils.  
56 This interaction involves the development of specific organs, the root nodules, that host  
57 rhizobia and provide them with carbon sources and the microenvironment required for  
58 nitrogen fixation. In most rhizobia-legume associations, the perception of bacterial lipo-  
59 chitooligosaccharide (LCO) signals commonly known as Nod factors in the epidermis  
60 initiates a molecular cascade that is transmitted to the inner cell layers activating cell  
61 division, with simultaneous rhizobial infection of the host root. In *Medicago truncatula*,  
62 rhizobial infection is initiated within a curled root hair tip and the subsequent formation of a  
63 transcellular apoplastic compartment called the infection thread (IT). The IT traverses the  
64 epidermis, cortex and ramifies within the confines of the nodule primordium, developed by  
65 organized cell divisions in the root endodermis, cortex, and pericycle (Roy et al., 2020).  
66 These coordinated mechanisms of root infection and nodule organogenesis ensure that nodule  
67 maturation occurs in perfect coordination with nodule colonization by rhizobia (Xiao et al.,  
68 2014). *M. truncatula* produces indeterminate nodules that are characterized by a longitudinal  
69 gradient of differentiation with a persistent distal apical meristem and older proximal layers  
70 (Ferguson et al., 2010). Like other developmental processes, nodulation is modulated by  
71 phytohormones (Buhian and Bensmihen, 2018).

72         The plant hormone cytokinin (CK) is involved in various aspects of plant growth and  
73 development. CK signaling consists of a phosphorelay mediated by a two-component system,  
74 comprising a sensor and a response regulator. The site of CK binding is suggested to be the  
75 lumen of the endoplasmic reticulum. The CK-induced phosphorelay causes transcriptional  
76 changes in the nucleus mediated by type-B and type-A response regulators (RRs), which play  
77 positive, and negative roles in this regulation, respectively (Kieber and Schaller, 2018). Type-

78 B RRs typically bind to target genes at the consensus sequence (A/G)GAT(T/C) enriched in  
79 their *cis*-regulatory regions, and synthetic CK sensors called Two-Component signaling  
80 Sensors (TCS) containing concatemeric versions of this sequence have been studied in plants  
81 (Zürcher et al., 2013). CK plays essential roles during nodule formation (Ferguson and  
82 Mathesius, 2014; Gamas et al., 2017). In *M. truncatula*, CK accumulates in the root  
83 susceptibility zone as early as 3 hours after LCO treatment (van Zeijl et al., 2015). The TCS  
84 is activated by rhizobium in the cortical cells in *M. truncatula* that forms indeterminate  
85 nodules and in *Lotus japonicus* that forms determinate ones (Held et al., 2014; Jardinaud et  
86 al., 2016). In *Glycine max*, a regulatory feedback loop involving auxin and cytokinin governs  
87 proper determinate nodule development (Turner et al., 2013). Rhizobia also induce the  
88 expression of CK biosynthetic and signaling genes in the epidermis, based on transcriptomic  
89 studies focused on the epidermal cells of *M. truncatula* (Liu et al., 2015; Damiani et al.,  
90 2016; Jardinaud et al., 2016). The *pMtRR9::GUS* transcriptional reporter, a cytokinin RR  
91 type-A (RRA), was rapidly detected in the root epidermis, in addition to other root tissues, in  
92 response to LCOs (Op den Camp et al., 2011). A more recently developed CK signaling  
93 sensor termed TCS new (TCSn) (Zürcher et al., 2013), driving GUS expression, enabled  
94 detection of the activation of a CK response in the *M. truncatula* root epidermis and the outer  
95 cortex 8 hours after the LCO treatment (Jardinaud et al., 2016). In *L. japonicus*, the TCS  
96 reporter was activated first in the cortex and only later in the epidermis by rhizobia (Held et  
97 al., 2014; Reid et al., 2017). The sequence of activation of CK responses during early  
98 symbiotic stages may differ between these two nodulating species, likely as a reflection of  
99 differences in the process of nodule development between them (Gamas et al., 2017).

100 CK plays an antagonistic role during root infection at the epidermis and nodule  
101 formation in the cortex (Gamas et al., 2017). The positive regulation of CK on nodule  
102 formation was first reported by physiological studies, which showed that exogenous CK

103 induces the formation of nodule-like structures on the roots of several legumes (Heckmann et  
104 al., 2011). Further evidence for the positive role of CK in nodule inception has come from the  
105 analysis of nodulation-defective mutants altered in CK receptors, LOTUS HISTIDINE  
106 KINASE 1 (LHK1) in *L. japonicus*, and CYTOKININ RESPONSE 1 (CRE1) in *M.*  
107 *truncatula* (Gonzalez-Rizzo et al., 2006; Murray et al., 2007; Tirichine et al., 2007; Plet et al.,  
108 2011), and other CK receptors in both legumes (Held et al., 2014; Boivin et al., 2016).  
109 Moreover, gain-of-function *LHK1* and *MtCRE1* lines generate spontaneous nodules in the  
110 absence of the rhizobia (Tirichine et al., 2007; Madsen et al., 2010; Ovchinnikova et al.,  
111 2011). Transcriptomic analyses in *M. truncatula* also enabled identifying symbiotic genes  
112 that are rapidly induced by an exogenous CK on roots (Ariel et al., 2012), such as *NODULE*  
113 *INCEPTION* (*NIN*). *NIN* and the CRE1-dependent pathways are connected by a positive  
114 feedback loop, with *NIN* binding to the CRE1 promoter and activating its expression (Vernié  
115 et al., 2015). Similarly, *CRE1* is required for cytokinin-induced *NIN* expression (Plet et al.,  
116 2011). In *L. japonicus* roots, exogenous CK treatment also induces *NIN* specifically in root  
117 cortical cells (Heckmann et al., 2011). Moreover, *NIN* ectopic expression leads to root  
118 cortical cell divisions and nodule-like structures in both *L. japonicus* and *M. truncatula*  
119 (Soyano et al., 2013; Vernié et al., 2015), through the activation of transcription factors, such  
120 as Nuclear Factor Y subunit A1 (NFYA1) and Nuclear Factor Y subunit B1 (NFYB1)  
121 (Soyano et al., 2013; Laloum et al., 2014; Hossain et al., 2016; Shrestha et al., 2021). In  
122 contrast, in the epidermis of *M. truncatula*, CK negatively regulates root infection (Gamas et  
123 al., 2017). The epidermal CK pool was depleted by expressing a CK  
124 OXIDASE/DEHYDROGENASE (CKX) enzyme under an epidermis-specific promoter,  
125 which lead to an increased number of ITs and nodules (Jardinaud et al., 2016). Additionally,  
126 exogenous CK treatment inhibited the induction of the LCO response and pre-infection  
127 marker *MtENOD11*, in a MtCRE1 dependent fashion (Jardinaud et al., 2016). Recently, a link

128 between the epidermis-derived CK and cortical cell divisions was established (Jarzyniak et  
129 al., 2021). *M. truncatula* ATP-binding cassette (ABC) transporter 56 (MtABCG56),  
130 transports CK from the epidermal to cortical cells, activating the CRE-dependent CK  
131 responses, including the *RRA4* (Jarzyniak et al., 2021). These downstream responses trigger  
132 further CK biosynthesis required for nodule development (Mortier et al., 2014; van; Zeijl et  
133 al., 2015; Vernié et al., 2015).

134 Several CK biosynthesis genes, including *ISOPENTENYL TRANSFERASE 3 (IPT3)*  
135 and *1 (IPT1)*, *CYP735A1*, *LONELY GUY 1 (LOG1)*, and *2 (LOG2)*, are upregulated in  
136 response to LCOs or during nodulation in *L. japonicus* and *M. truncatula* (Chen et al., 2014;  
137 Mortier et al., 2014; Azarakhsh et al., 2015; van Zeijl et al., 2015; Azarakhsh et al., 2018;  
138 Schiessl et al., 2019). The expression of *MtIPT3*, *MtLOG1* and *MtLOG2* transcriptional GUS  
139 reporters were also detected in the nodule primordium (Mortier et al., 2014; Azarakhsh et al.,  
140 2020). Decreasing *LOG1* expression leads to impaired nodulation in *M. truncatula*, being  
141 involved in the nodule primordium development (Mortier et al., 2014). All these studies  
142 highlight the importance of CK biosynthesis during root infection and nodule development.  
143 Transcriptional fusions using GUS gene reporter allowed identifying CK signaling at a tissue-  
144 specific level in *M. truncatula* roots during these biological processes. However, these studies  
145 have been limited in their temporal resolution. A detailed spatial and temporal  
146 characterization of the CK response in *M. truncatula* roots should clarify the role of this  
147 hormone in nodule induction and organogenesis.

148 In the current study, we present the spatiotemporal regulation of CK response in  
149 rhizobia-inoculated roots using a new fluorescence-based CK signaling sensor,  
150 *pTCSn::nls:tGFP*. To further explore the potential of this sensor, we employed it along with  
151 the transcriptional fusion of the CK biosynthetic gene *IPT3* during nodule development.  
152 Simultaneous monitoring of the *pIPT3::tdTOMATO* reporter and the CK sensor activities

153 during nodule development suggested that *IPT3* induction at the base of nodule primordium  
154 contributes to CK biosynthesis, which in turn, promotes nodule organogenesis in *M.*  
155 *truncatula*. Furthermore, we analyzed the loss-of-function mutant of *ipt3* and found that it is  
156 required for nodule development in *M. truncatula*.

157

158

159 **RESULTS**

160

161 **A fluorescent protein-based cytokinin sensor is activated in root epidermal and cortical**  
162 **cells upon CK treatment in *Medicago truncatula***

163 CK responses have been studied in response to LCOs and *S. meliloti* in *M. truncatula* roots,  
164 using transcriptional reporters with *RRA*s or the synthetic *TCSn* promoters fused to the GUS  
165 gene (Op den Camp et al., 2011; Plet et al., 2011; Jardinaud et al., 2016; Fonouni-Farde et al.,  
166 2017). In soybean, fluorescent protein-based auxin and CK transcriptional reporters have  
167 been successfully used to monitor and determine their cellular level ratios in root and nodule  
168 tissues (Fisher et al., 2018). In *L. japonicus*, a tissue-specific time course experiment  
169 following the activity of *TCSn::nls:GFP* showed that CK response occurs in cortical cells  
170 before spreading to the epidermis (Reid et al., 2017).

171 In the present work, we designed a fluorescent protein-based CK transcriptional  
172 reporter that addresses the limitations of the GUS reporter system. This CK sensor consists of  
173 the *TCSn* promoter (Zürcher et al., 2013) driving the expression of the turbo green fluorescent  
174 protein (tGFP) fused to a nuclear localization signal peptide (*pTCSn::nls:tGFP*). This  
175 alternative approach to the GUS reporter system allows continuous, non-destructive  
176 monitoring of CK signaling throughout plant development by live imaging, and co-imaging  
177 with other fluorescence-based reporters.

178 Before evaluating the CK sensor activity, we characterized the timing of CK  
179 transcriptional responses in *M. truncatula* roots by analyzing the expression profiles of three  
180 *RRA* genes, *RRA3*, *RRA4*, and *RRA11* after 1, 8, 24, and 48 hours of 1  $\mu$ M 6-benzylamino-  
181 purine (6-BAP) treatment. We found that *RRA*s reached their maximum gene expression after  
182 24 hours of the 6-BAP treatment (**Fig. 1A**). Based on the CK signaling activation timing, we  
183 assessed the tissue-specific CK response using the *pTCSn::nls:tGFP* CK sensor in *M.*



184 *truncatula* transgenic roots after 24 hours of BAP treatment. In non-treated roots, tGFP was  
185 primarily detected in the columella, root apical meristem, and elongation zone of the root tip,  
186 as previously described for the *pTCSn::GUS* reporter (**Fig. 1B**; Jardinaud et al., 2016;  
187 Fonouni-Farde et al., 2017). Very few cells showed nuclei-localized fluorescence in the  
188 differentiation zone (DZ) of the root (**Fig. 1C**), indicating the absence of CK response in the  
189 DZ in non-treated roots. In contrast, roots treated with 1  $\mu$ M 6-BAP for 24 hours exhibited a  
190 strong induction of nuclei-localized fluorescence in the epidermis and cortex in the DZ and  
191 the differentiated zone of the root (**Fig. 1 D-E**). DAPI counterstain confirmed that tGFP  
192 fluorescence was localized to the nuclei (**Fig. S1**). These observations indicate that the  
193 *pTCSn::nls:tGFP* sensor constitutes a suitable molecular tool to investigate the CK response  
194 in *M. truncatula* and that CK signal transduction occurs in *M. truncatula* epidermal and  
195 cortical cells after the application of CK to the root.

196

### 197 **Tissue-specific time-course of CK signaling during the early symbiotic interaction with** 198 ***S. meliloti* in *M. truncatula* roots**

199 To characterize the spatial-temporal regulation of CK response during indeterminate nodule  
200 development in *M. truncatula*, we analyzed the activity of *pTCSn::nls:tGFP* in a time-course  
201 experiment using transgenic roots after *S. meliloti* inoculation. Prior to inoculation, very low  
202 *pTCSn::nls:tGFP* activity was detected in the cell layers of the susceptibility zone (SZ; **Fig.**  
203 **2A**). At 4 hours after inoculation (hai), *pTCSn::nls:tGFP* activity started in the epidermal  
204 cells of the SZ, indicating that rhizobia-induced CK response in the epidermis is a very early  
205 response in *M. truncatula* (**Fig. 2B**). At 24 hai, nuclei-localized fluorescence was still  
206 observed in the epidermal cells but was also present in outer cortical cells of the SZ (**Fig. 2C**)  
207 and by 48 hai, a strong fluorescence was widespread in the outer and inner cortical cell layers

208 of the SZ (**Fig. 2D**). Thus, CK signaling is activated first in the epidermis, reaches the outer  
209 cortical cells within 24 hai and extends to the majority of cortical cell layers within 48 hai.

210

211 **Tissue-specific time-course of the activation of CK signaling during the indeterminate**  
212 **nodule development in *M. truncatula***

213 Characterization of CK response during indeterminate nodule development remains limited to  
214 a few time points during the process by using *RRA* promoters fused to GUS reporters in *M.*  
215 *truncatula* (Op den Camp et al., 2011; Plet et al., 2011). To obtain a better spatio-temporal  
216 resolution of CK response during the indeterminate nodule initiation and development, we  
217 monitored the *pTCSn::nls:tGFP* activity throughout nodule development from the first cell  
218 divisions in the pericycle, the endodermis, and the cortex, until the mature nodule formation.  
219 Moreover, we associate the tissue-specific *pTCSn::nls:tGFP* activity time course with the  
220 sequential cell division program characterized previously during nodule formation (Xiao et  
221 al., 2014).

222 At 3 days after inoculation (dai), the *pTCSn::nls:tGFP* signal that was widely  
223 distributed across the cortical cell layers of the SZ (see previous section) disappears, giving  
224 rise to a robust and more localized signal at the pericycle and dividing cortical cell layers C3-  
225 C5 that are related with the nodule primordium initiation, at the developmental stages II and  
226 III (**Fig. 2E**; Xiao et al., 2014). This nodule primordium-specific pattern of the CK response  
227 allowed us to clearly distinguish a nodule primordium from a lateral root primordium (LRP)  
228 during their early developmental stages, where tGFP expression was weaker and limited to  
229 the vasculature and developing meristem (**Fig. S2**). At 4 dai, we found that the stage IV and  
230 V nodule primordia showed the CK signaling activation extending to most of the dividing  
231 cortical cell layers (**Fig. 2F**). At 5 dai, the nodule primordium emerges from the main root  
232 and becomes a true nodule when the meristem starts functioning (stage VI). At this point, the

233 CK response was localized to the C3, and the C4-C5 derived cells that form the multi-layered  
234 nodule meristem (C3) and the non-meristem zone immediately below (C4-C5), respectively  
235 (**Fig. 2G**). At 6 dai, the nodule is in an advanced developmental stage, with the vascular  
236 bundles starting to surround the nodule meristem. At this stage, the CK signaling is strongly  
237 activated in the central zone of the nodule, including the nodule meristem and the C4/5-  
238 derived cells that will be colonized by rhizobia (**Fig. 2H**).

239

#### 240 **Cytokinin biosynthesis by IPT3 is required for nodule development in *M. truncatula***

241 CK and its downstream responses are critical regulators of nodule initiation and development.  
242 However, the molecular mechanism of the local CK biosynthesis during nodule  
243 organogenesis remains poorly characterized in *M. truncatula*. It has been proposed that a  
244 KNOX3 controls the transcription of two CK biosynthesis genes, *IPT3* and *LOG2*, to  
245 promote CK biosynthesis during nodule organogenesis (Azarakhsh et al., 2015; Azarakhsh et  
246 al., 2020). However, the genetic characterization of CK biosynthesis genes in *M. truncatula*  
247 remains limited to *LOG1* (Mortier et al., 2014). Recently, it has been proposed that ABCG56  
248 actively exports bioactive CKs from the epidermis to the cortex, driving the CRE1-dependent  
249 cortical CK response. This would lead to *de novo* CK biosynthesis in the cortex, required for  
250 nodule organogenesis (Jarzyniak et al., 2021).

251 It was previously shown that the *IPT3* expression is induced at 72 hai, reaching a  
252 maximum at 5 dai (Schiessl et al., 2019). Moreover, the *pIPT3::GUS* reporter showed that  
253 *IPT3* is expressed in the nodule primordium of *M. truncatula* (Azarakhsh et al., 2020). These  
254 observations indicate that *IPT3* represents an excellent candidate to investigate the role of CK  
255 biosynthesis during nodule organogenesis.

256 We identified lines from the Noble Research Institute *Medicago truncatula Tnt1*  
257 collection showing an insertion in the single exon of *IPT3* (Tadege et al., 2008). These

258 mutants were named *ipt3-1*; *ipt3-2*, and *ipt3-3* (**Fig. 3A**). After isolating homozygous  
259 individuals, *ipt3* knockout was confirmed by qRT-PCR analyses (**Fig. 3B**). Then, *ipt3*  
260 knockout mutants and wild-type plants were used to perform nodulation assays. At 14 dai, all  
261 the *ipt3* knockout mutants showed a significantly lower nodule number than the control (**Fig.**  
262 **3C and D**). Moreover, between 40-55% of the *ipt3* mutants showed neither emerging nodule  
263 primordia nor nodules, while only 15% of wild-type plants lacked nodules (**Fig. 3E**). Root  
264 dry weight measurements revealed no significant differences between wild-type plants and  
265 *ipt3* mutants after 14 dai (**Fig. 3F**), while shoot dry weight significantly decreased only in  
266 *ipt3-1* (**Fig. 3G**). These results strongly suggest that the lower nodule number observed in  
267 *ipt3* mutants is a consequence of the loss of IPT3 function and not a pleiotropic effect caused  
268 by *Tnt1* insertions.

269

#### 270 ***IPT3* expression is induced in the stele at the base of the developing nodule primordium**

271 To get further insights into the role of *IPT3* during nodule organogenesis, we investigated  
272 *IPT3* expression by monitoring the activity of tdTOMATO fluorescent protein driven by  
273 *IPT3* promoter in a time-course experiment. This strategy allowed us to monitor *IPT3*  
274 expression and CK signaling simultaneously after the inoculation with *S. meliloti* through live  
275 imaging in *M. truncatula* transgenic roots. To achieve this goal, we cloned the *IPT3* promoter  
276 (2312 bp; see Method section) in frame with the tdTOMATO fluorescent protein fused to a  
277 nuclear localization signal peptide resulting in the *pIPT3::nls:tdTOMATO* construction.  
278 Before inoculation with rhizobia, *IPT3* expression and CK response overlapped at the root  
279 stele (**Fig. S3 A-C**). At 24 hours post *S. meliloti* inoculation, *IPT3* expression was similar to  
280 the control treatment and still localized in the vasculature (**Fig. S3 D-F**). In contrast, the CK  
281 response was observed in the epidermis and outer cortical cells of the SZ, as described above  
282 (**Fig. S3 G-I**). At 2 dai, CK response expanded to the majority of root cortical layers of the

283 *SZ*, while *pIPT3::nls:tdTOMATO* activity was still mainly found in the stele with a similar  
284 expression level to that of the control (**Fig. 4A-C; Fig S3E and H**). This suggests that *IPT3*  
285 is not involved in the CK signaling activation during the early symbiotic interaction described  
286 in the present research work (48 hai).

287 At 3 dai, nodule primordium was initiated (between stage II and III), and CK response  
288 was mainly localized to the dividing cortical cells and stele (**Fig 4D**). *IPT3* expression was  
289 strongly induced in the stele at the base of dividing cortical cells of the nodule primordium  
290 (**Fig. 4E**). This result is consistent with prior reports of the induction of the *IPT3* transcription  
291 72 hours after *S. meliloti* inoculation (Schiessl et al., 2019; **Fig. S4**). The induction of the CK  
292 response and *IPT3* expression overlapped at the root vasculature and the base of the nodule  
293 primordium, likely involving pericycle (**Fig. 4F**). At 4 dai, with the nodule primordium at  
294 advanced stages of development and CK response extended to more cortical cell layers (**Fig.**  
295 **4G**), *IPT3* expression levels remained high and localized in the stele below the dividing  
296 cortical cells (**Fig. 4H**), showing lower overlapping with CK signaling in the stele (**Fig. 4I**).  
297 At 6 dai, CK response was mainly localized at the central zone of the nodule (**Fig. 4J**), while  
298 *IPT3* expression was strongly activated and started to propagate from the root stele to the  
299 nodule vasculature (**Fig. 4K**). At this stage, the nodule meristem activates, and the overlap  
300 between the CK response and *IPT3* expression declined, with each one showing a specific  
301 spatial pattern (**Fig. 4L**). At 7 dai, CK response was mainly localized to the nodule meristem  
302 (**Fig 4M**). At the same time, *IPT3* expression was also detected in the developing nodule  
303 vasculature (**Fig. 4N**), in line with *IPT3* expression in nodule vascular bundles recently  
304 reported using *pIPT3::GUS* (Azarakhsh et al., 2020). At this stage, CK response was  
305 restricted to the nodule meristem, and *IPT3* expression was localized at the base of the nodule  
306 and vascular bundles (**Fig. 4O**). Together, these results suggest that the *IPT3* induction at the

307 base of the nodule primordium contributes to the biosynthesis of CK, which in turn triggers  
308 CK signaling during nodule organogenesis.

309

### 310 ***IPT3* is required for the induction of symbiotic genes during nodule initiation**

311 Rhizobia-induced nodule initiation is dependent on crucial nodule development regulators  
312 that promote cortical cell division, including the cytokinin receptor *CRE1*, the transcription  
313 factor *NIN* and its targets *LBD16* and *NFYA1* (Gonzalez-Rizzo et al., 2006; Plet et al., 2011;  
314 Laporte et al., 2014; Vernié et al., 2015; Schiessl et al., 2019). *ipt3* mutants show impairment  
315 of nodule development (**Fig. 3D**), suggesting that the biosynthesis of CK precursors by *IPT3*  
316 is required to activate CK-induced positive regulators of nodule development. To test this  
317 hypothesis, we performed an *in vitro* nodulation assay using wild-type and two *ipt3* mutant  
318 lines, *ipt3-2* and *ipt3-3*, to compare gene expression of these essential regulatory genes. *ipt3-1*  
319 was excluded due to the previously mentioned reduced shoot mass phenotype. 3-day-old *M.*  
320 *truncatula* plants were inoculated with *S. meliloti*, and the SZ of the root was harvested at 4  
321 dai for gene expression analyses. We found that expression of *NIN*, *LBD16*, and *NFYA1* was  
322 upregulated in wild-type compared to non-inoculated control plants. In contrast, in the *ipt3*  
323 mutants, these genes were not significantly induced (**Fig. 5**), indicating that the  
324 transcriptional activation of positive regulators of nodulation requires *IPT3* at 4 dai.  
325 *CYCLINA3;A* (*CYC3;A*), a CK-induced gene and a cell division marker during nodule  
326 initiation (Schiessl et al., 2019), did not show significant induction either in the wild-type or  
327 *ipt3* mutants with respect to the control treatment (**Fig. 5**). Besides *CRE1*, we found  
328 significant transcriptional induction of CK signaling genes, such as *RRA3* and *RRA11*, which  
329 was affected in *ipt3* mutants compared to the control (**Fig. 5**), indicating *IPT3* is required for  
330 the activation of CK signaling during nodule initiation. On the contrary, *RRA4* was not  
331 induced in wild-type and *ipt3* mutants by rhizobia compared to the control (**Fig. 5**). *IPT3* was

332 also upregulated in wild-type plants at 4 dai with respect to the control (**Fig. 5**), consistent  
333 with the rhizobia-induced expression pattern observed in previous work and with the visual  
334 reporter (**Fig. S4**; Schiessl et al., 2019; **Fig. 4H**). Together, these results suggested that  
335 rhizobia-induced *IPT3* expression contributes to CK biosynthesis. In turn, CK biosynthesis  
336 promotes transcriptional activation of positive nodule development regulators and CK  
337 signaling genes required for nodule development.

338

339

## 340 **DISCUSSION**

341 In the present study we developed a novel tGFP-based *TCSn* reporter that allowed us to  
342 perform live imaging tissue-specific time course, with a high temporal resolution of the  
343 rhizobia-induced CK signaling. This reporter system allowed us to gain further insights into  
344 the cytokinin signaling induction during rhizobia perception and nodule formation in *M.*  
345 *truncatula*. Our data indicate that the CK signaling activation occurs in multiple, discrete  
346 stages, initially activating in the epidermis of the root SZ and expanding across the cortex  
347 during the first 48 hrs. Rhizobia trigger this first wave of CK signaling in the SZ of the *M.*  
348 *truncatula* root. After 48 hours, this widespread CK signaling activation disappears, giving  
349 way to the second wave of CK signaling activation in the cortex, localized in the specific  
350 zones where the cell divisions that will give rise to the nodule primordium. The  
351 characterization of *ipt3* mutants suggests that IPT3 contributes to the CK biosynthesis that  
352 triggers this second wave of signaling activation.

353 It has been proposed recently that the *MtABCG56* transporter, which is  
354 transcriptionally induced between 6 and 24 hours after the LCO treatment, exports bioactive  
355 CKs from the root epidermis to the cortex, promoting CRE1-dependent cortical CK response  
356 (Jarzyniak et al., 2021). In agreement with this model, we observed that CK signaling was  
357 activated at 24 hai in the outer cortical cells (**Fig. 2C**), and it extends to the majority of  
358 cortical cell layers at 48 hai in the SZ (**Fig. 2D**), possibly due to the amplification of CRE1-  
359 triggered CK response. These results are consistent with the similar CK activation patterns  
360 observed previously using *pTCSn:GUS*, showing GUS activity localized at the epidermis and  
361 outer cortical cells at 8 hai and the inner cortical cells at 72 hai, and *in situ* hybridization  
362 detected expression of *RRA4* mRNA widely in the root cortex at 48 hai (Vernié et al., 2015;  
363 Jardinaud et al., 2016). Here, a live imaging time course allowed us to precisely elucidate the  
364 timing of the CK signaling activation pattern observed during the early symbiosis interaction.



365 Consistent with these observations, *in situ* hybridization showed that *RR4* mRNA levels  
366 strongly accumulate in the different *M. truncatula* root cortex layers at 48 hai with *S. meliloti*  
367 (Vernié et al., 2015). In contrast, in *L. japonicus*, CK signaling activation in cortical cells  
368 precedes epidermal CK responses (Held et al., 2014; Reid et al., 2017). These results suggest  
369 that the spatial-temporal CK signaling activation may differ between determinate and  
370 indeterminate nodulating species. The difference in rhizobia-triggered CK signaling patterns  
371 between these species highlights the need for high-resolution tissue-specific characterization  
372 of the CK responses in other legumes.

373 The second wave of CK signaling activation in the cortex requires *de novo* CK  
374 biosynthesis. It has been reported that CK biosynthesis genes, such as *LOG1*, *LOG2*, and  
375 *IPT3*, are expressed in the nodule primordium of *M. truncatula* (Mortier et al., 2014;  
376 Azarakhsh et al., 2020). It has been proposed that KNOX3 transcription factor directly  
377 promotes the expression of cytokinin biosynthesis genes by *MtLOG1*, *MtLOG2*, and *MtIPT3*  
378 which are co-expressed during nodule development in *M. truncatula* (Azarakhsh et al., 2020).  
379 By monitoring the *pIPT3::nls::tdTOMATO* and the CK sensor simultaneously, we resolved  
380 the spatial-temporal pattern of *IPT3* expression and its interaction with the CK signaling  
381 during the indeterminate nodule development in *M. truncatula*. We found that *IPT3* is  
382 induced in the stele, likely at the pericycle and adjacent cells to the first dividing cortical cells  
383 at 3 dai (**Fig. 4E**), overlapping with CK signaling activation at the base of the nodule  
384 primordium (**Fig. 4F**). This result disagrees with the *pIPT3::GUS* activity reported in the  
385 whole nodule primordium after 3 days post inoculation (Azarakhsh et al., 2020). This  
386 discrepancy may be explained by a higher sensitivity of the GUS reporter, which could reveal  
387 the promoter activity even with very low expression levels. This outcome may also be  
388 derived by the diffusion of the GUS reaction product to adjacent cells, especially when  
389 extended incubation periods are required. However, similarly to what was reported with

390 *pIPT3::GUS*, after 7 days post inoculation (Azarakhsh et al., 2020), we found that *IPT3*  
391 expression spreads from the stele at the base of the nodule to the nodule developing vascular  
392 bundles (**Fig. 4N**).

393 IPT enzymes catalyze the formation of iP riboside 5'-diphosphate (iPRDP) or iP  
394 riboside 5'-triphosphate (iPRTP), which are precursors for bioactive cytokinin biosynthesis  
395 by LOG family enzymes (Sakakibara, 2006). The induction of *IPT3* at the base of the nodule  
396 primordium may provide the substrate for *LOG* genes, such as *LOG1* and *LOG2*, which  
397 catalyzes the production of the bioactive CKs (Kurakawa et al., 2007). Indeed, analyses of  
398 *LOG1* and *LOG2* promoters fused to GUS revealed that these genes are expressed in the  
399 central zone of developing nodule primordia, overlapping with our observations of the CK  
400 signaling activation (Mortier et al., 2014; Azarakhsh et al., 2020). Similarly, *LOG1* RNAi  
401 plants show lower nodules than control plants in *M. truncatula* (Mortier et al., 2014), and we  
402 found a similar result in our *ipt3* loss of function mutants. The same effect has been reported  
403 in *L. japonicus IPT3* RNAi plants, which produced fewer ITs and nodules than wild-type  
404 (Chen et al., 2014). However, it has been proposed that *LjIPT3* also participates in the  
405 generation of shoot-derived CK precursors, which participate in the autoinhibition of  
406 nodulation (AON) mechanism in *L. japonicus* (Sasaki et al., 2014). These findings suggested  
407 that IPT3-derived CKs may be involved in different mechanisms in shoots and roots. The  
408 different timing of *IPT3* activation explains its dual role during nodulation of *L. japonicus*. If  
409 *IPT3* participates in AON in *M. truncatula* remains an open question.

410 Rhizobia-dependent transcriptional activation of CK-induced positive regulators of  
411 nodule development, such as *NIN*, *CRE1*, *LBD16*, and *NFYAI*, was affected in *ipt3* mutants  
412 at 4 dai (**Fig. 5**). Together, these results suggested that *de novo* CK precursor synthesis is  
413 required for the CK-mediated induction of key nodule development regulators, promoting CK  
414 downstream responses and cell divisions during nodule development.

415 In conclusion, we propose a high-resolution model for the tissue-specific temporal  
416 activation pattern of CK signaling during indeterminate nodule development in *M. truncatula*  
417 (**Fig. 6**). Furthermore, we show that *IPT3*, a cytokinin biosynthesis gene, contributes to *de*  
418 *novo* CK biosynthesis, which in turn promotes the expression of a critical positive regulator  
419 of nodule development, such as *NIN* and *CRE1*.

420

## 421 **MATERIALS AND METHODS**

422

### 423 **Plant material and growth conditions**

424 *Medicago truncatula* R108 is the wild-type background for the *Tnt1* mutant lines; Jemalong  
425 A17 was used for the rest. Seeds were scarified 8 min in sulfuric acid and sterilized for 4 min  
426 in bleach (12% [v/v] sodium hypochlorite). After rinsing with sterilized water, seeds were  
427 sown on 1% agar plates supplemented with 1  $\mu\text{M}$  gibberellic acid and stored at 4°C for 3  
428 days before incubating overnight at 24°C in the dark. Germinated seedlings were transferred  
429 to square plates (22.5x22.5 cm) containing modified Fahræus medium (Boisson-Dernier et  
430 al., 2001) supplemented with 15 mM  $\text{NH}_4\text{NO}_3$  and grown vertically at 24°C under long-day  
431 conditions in a growth chamber (16 h light/8 h dark; 150  $\mu\text{mol m}^{-2} \text{s}^{-1}$  light intensity).

432

### 433 **Cloning**

434 The Golden Gate MoClo and MoClo Plant toolkits (New England Biolabs) were used to  
435 obtain all constructions described in this work (Engler et al., 2014). The cloning reaction  
436 consists of 25 cycles of 3 min at 37°C for digestion and 4 min at 16°C for ligation combining  
437 the restriction enzymes *BsaI*-HF (New England BioLabs, Ipswich, UK) for level 1 reaction or  
438 *BpiI* (Thermo Fisher Scientific, Waltham, USA) for level 2 reaction together with T4 DNA  
439 Ligase (New England BioLabs, Ipswich, UK). *TCSn* promoter DNA sequence (Zürcher et al.,

440 2013) comprising overhangs was synthesized by Synbio Technologies and cloned in frame  
441 with a nuclear localization signal (Addgene, catalog number: 50294), turbo GFP (Addgene,  
442 catalog number: 50322), and *Solanum lycopersicum* ATPase terminator (Addgene, catalog  
443 number: 50344) in the level 1 vector pICH47811 (Addgene, catalog number: 48008). To  
444 amplify *IPT3* promoter (gene ID v4: Medtr1g072540; v5: MtrunA17Chr1g0185751) genomic  
445 DNA (gDNA) extraction was performed as previously described (Causevic et al., 2005) with  
446 the following modifications. 3-day-old *M. truncatula* A17 seedlings were frozen in liquid  
447 nitrogen and ground in 2 ml tubes using a homogenizer (MiniG 1600, Spex, Metuchen, NJ).  
448 200  $\mu$ L of pre-heated CTAB buffer containing 0.2%  $\beta$ -mercaptoethanol, 4% PVP, and 0.1  
449 mg/ml Proteinase K (Invitrogen) was added to the ground tissue and digested for 1 h at 60  
450  $^{\circ}$ C. After adding 1 volume of chloroform/isoamyl alcohol (24:1, v/v), samples were mixed  
451 and then centrifuged at 14,000xg for 10 min. The aqueous phase was transferred to a new  
452 tube and incubated with 1  $\mu$ L of RNase A (Macherey-Nagel, 12mg/mL stock) for 30 min at  
453 37  $^{\circ}$ C. The chloroform/ isoamyl alcohol cleaning step was repeated and the aqueous phase  
454 was transferred to a new tube and mixed with 1 volume of isopropanol and incubated for 30  
455 min at -20  $^{\circ}$ C. The sample was centrifuged at 14,000xg for 15 min, and the pellet was washed  
456 with 70% and 95% ethanol by centrifugation for 5 min. The pellet was air-dried and  
457 resuspended in 50  $\mu$ L of TE buffer (Invitrogen, catalog number: 12090015). A genomic  
458 fragment of 2312 bp upstream of the *IPT3* coding sequence including the 5' UTR was  
459 amplified using primers containing Golden Gate overhangs (**Table S1**) from *M. truncatula*  
460 A17 gDNA. 100 ng of gDNA were used to set up a PCR using Phusion<sup>®</sup> High-Fidelity DNA  
461 Polymerase (New England BioLabs). The PCR product was separated in a 1% agarose gel by  
462 electrophoresis. *IPT3* promoter DNA sequence was extracted and purified from the gel using  
463 Monarch DNA Gel Extraction Kit (New England Biolabs) and Sanger sequenced at Genewiz  
464 (South Plainfield, NJ). Also, tdTOMATO coding sequence (CDS) was amplified using

465 primers containing Golden Gate overhangs (**Table S1**). IPT3 promoter was cloned in frame  
466 with a nuclear localization signal (Addgene, catalog number: 50294), tdTOMATO CDS, and  
467 35S terminator (Addgene, catalog number: 50337) in the level 1 vector pICH47802  
468 (Addgene, catalog number: 48007). Level 1 pICH47811-*pTCSn::nls:tGFP::tATPase*  
469 (position 2) was cloned together with pICH47802-*p35S::ER:tdTOM::tNOS* selection marker  
470 (position 1) in the final plant expression vector pAGM4673 (Addgene, catalog number:  
471 48014). For simultaneous live imaging, pICH47811-*pTCSn::nls:tGFP* (position 2) was  
472 cloned together with pICH47802-*pIPT3::nls:tdTOMATO::t35S* (position 1) in the final plant  
473 expression vector pAGM4673 (Addgene, catalog number: 48014).

474

#### 475 **Genotyping of *Tnt1* insertion lines**

476 *M. truncatula* R108 *Tnt1* transposon insertion lines utilized in this research project, which are  
477 jointly owned by the Centre National De La Recherche Scientifique, were obtained from the  
478 Noble Research Institute, and were created through research funded, in part, by grants from  
479 the National Science Foundation, NSF #DBI-0703285, and NSF #IOS-1127155. Three  
480 different *Tnt1* transposon insertion lines, namely NF5762 (*ipt3-1*), NF3757 (*ipt3-2*), and  
481 NF4651 (*ipt3-3*), were genotyped by PCR using *Tnt1*-specific primers (Cheng et al., 2011)  
482 combined with *MtIPT3* gene-specific primers encompassing the insertions (**Table S1**). The  
483 expression of *MtIPT3* in homozygous plants was tested by RT-qPCR to confirm they were  
484 knockout mutants for the *MtIPT3* gene (**Table S1**).

485

#### 486 ***Agrobacterium rhizogenes*-mediated transformation and *in-vitro* nodulation assay**

487 The constructs described above were introduced into *Agrobacterium rhizogenes* MSU440  
488 electrocompetent cells and used to generate transgenic roots in *M. truncatula* (Boisson-  
489 Dernier et al., 2001). The transgenic roots were selected based on the fluorescence emitted by

490 *pTCSn::nls:tGFP* construct at the root tip under a fluorescence stereomicroscope. For *in-vitro*  
491 nodulation assay time-course experiment, 4-week-old transgenic roots were transferred to  
492 Buffered Nodulation Medium (BNM) (Ehrhardt et al., 1992) supplemented with 0.1  $\mu$ M  
493 AVG (aminoethoxyvinyl glycine hydrochloride; Sigma-Aldrich) to reduce ethylene  
494 production. After 5 days of acclimation, transgenic roots were treated with a suspension of *S.*  
495 *meliloti* (OD<sub>600</sub>=0.02) supplemented with 3  $\mu$ M of luteolin to activate LCO production  
496 (Sigma-Aldrich) collecting transgenic roots at different timepoints.

497

#### 498 ***In vitro* Cytokinin treatment and *S. meliloti* inoculation**

499 3-day-old *M. truncatula* seedlings were transferred to Fahräeus medium supplemented with  
500 water (mock treatment) or 1  $\mu$ M of 6-BAP (6-benzylaminopurine; Sigma-Aldrich) and  
501 maintained under the same growth conditions. Five roots from different seedlings were  
502 collected after 1, 8, 24, and 48 hours after CK treatment and immediately frozen in liquid  
503 nitrogen for RNA extraction. To analyze *pTCSn::nls:tGFP* activity after CK treatment, *M.*  
504 *truncatula* transgenic roots were submerged with a solution of 1  $\mu$ M 6-BAP for 5 min and  
505 then the solution was poured off. After 24 hours, transgenic roots harboring *pTCSn::nls:tGFP*  
506 construct were harvested and used for microscopic analysis. For qRT-PCR studies of nodule  
507 development regulator and CK signaling genes in wild-type and *ipt3* mutants, germinated  
508 seedlings were transferred to nitrogen-free Fahräeus medium and grown under the same  
509 conditions described above. 3-day-old seedlings were inoculated alongside the root with 200  
510  $\mu$ L/root of *S. meliloti* (OD<sub>600</sub>=0.02) resuspended in liquid nitrogen-free modified Fahräeus  
511 medium or with Fahräeus medium (mock treatment). Four days after inoculation, root  
512 segments from the susceptibility zone were harvested and pooled (10 plants per sample) for  
513 RNA extraction.

514

515 **Gene expression analysis**

516 RNA extraction was performed using as previously described (Chang et al., 1993). RNA  
517 samples were digested with DNase I and purified using RNA Clean & Concentrator™-5 kit  
518 (Zymo Research, Irvine, CA). Quantitative reverse transcription-polymerase chain reaction  
519 (qRT-PCR) analyses were performed using Luna Universal Probe One-Step qRT-PCR Kit  
520 (New England Biolabs) following the manufacturer's instructions, using 200 ng of total  
521 RNA. *EF1 $\alpha$*  gene was used as a housekeeping gene and the average of two technical  
522 replicates was obtained to calculate relative gene expression ( $\Delta\Delta C_t$  method). Primers used for  
523 qRT-PCR experiments are listed in **Table S1**.

524

525 **Microscopic live imaging**

526 Before microscopic imaging, transgenic roots were placed in a staining solution with 0.1%  
527 Calcofluor white M2R (Sigma-Aldrich) in PBS 1X (Corning) for 10 minutes at room  
528 temperature and then rinsed with PBS 1X before imaging. A confocal microscope Leica TCS  
529 SP5 confocal 119 was used for live imaging. At least 10 different roots for treatment or time  
530 point were analyzed. The excitation wavelengths for tGFP, tdTOMATO, and Calcofluor  
531 white M2R were 488, 561, and 405 nm, respectively. Fluorescent signals were collected at  
532 497–557 nm (tGFP), 570–643 nm (tdTOMATO), or 450–480 nm (Calcofluor white M2R).  
533 Fluorescent signals are presented with green (tGFP), red (tdTOMATO), and magenta  
534 (Calcofluor white M2R). For DNA staining, transgenic roots were incubated with 5  $\mu\text{g}/\text{ml}$   
535 4',6-diamidino-2-phenylindole (DAPI) in PBS 1X (Corning) for 10 min at room temperature  
536 and then rinsed with PBS 1X before imaging. DAPI excitation wavelength was 405 nm,  
537 while emission was collected at 450–480 nm.

538

539 ***In vivo* Nodulation assay and dry weight measurement**

540 For *in vivo* nodulation assay, seedlings were germinated as described above. Then, plants  
541 were grown in pots (9x9x9 cm) containing pre-sterilized calcined clay, Turface® (Profile  
542 Products, Buffalo Grove, IL) and sand (2:2 v/v), where Turface® was placed at the bottom  
543 and on the top of a layer of sand. Plants were watered with modified Fahræus medium  
544 supplemented with 0.5 mM of NH<sub>4</sub>NO<sub>3</sub> and covered with a lid. After one week of  
545 acclimation, Fahræus medium supplemented with 0.5 mM of NH<sub>4</sub>NO<sub>3</sub> was removed entirely  
546 from the tray and replaced with a nitrogen-free modified Fahræus medium. Plants were  
547 treated pouring 10 mL of *S. meliloti* 1021 suspension (OD<sub>600</sub>=0.02) into each pot. Plants were  
548 watered using nitrogen-free modified Fahræus medium every 2-3 days. After 2 weeks of  
549 inoculation, nodule number was assessed inspecting plant roots under a stereomicroscope.  
550 After counting nodules, roots and shoots for each individual were separated and dried in  
551 paper bags. After 48 hours of drying at 65°C, root and shoot dry weight were recorded.

552

### 553 **CONFLICT OF INTEREST**

554 None declared.

### 555 **FUNDING**

556 This work was supported by the Department of Energy Office of Science Biological and  
557 Environmental Research (Grant DE-SC0018247) to MK and JMA.



558 FIGURES

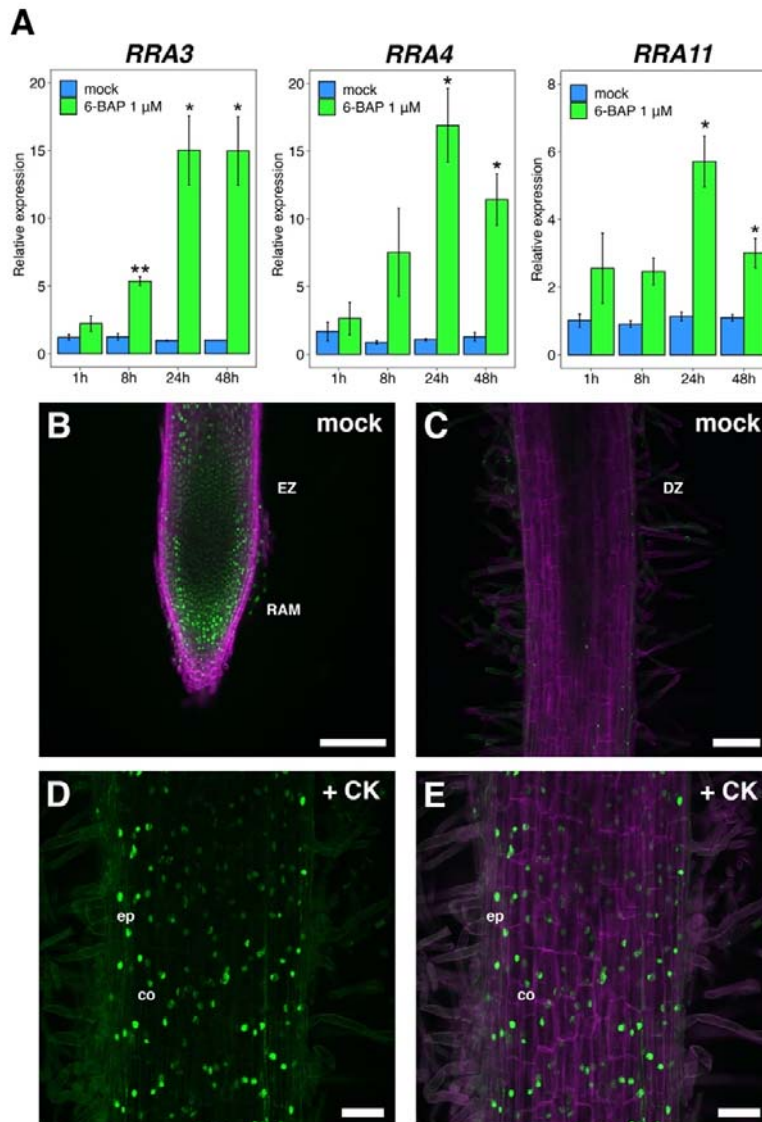

559

560 **Figure 1.** A reporter of CK signaling based on the *pTCSn::nls:tGFP* transcriptional fusion is  
561 activated in the epidermal and cortical cells after CK treatment. (A) qRT-PCR analyses of  
562 RRAs gene expression after 1, 8, 24, and 48 hours of 6-BAP or mock treatment. The  
563 Student's *t*-test was performed, and asterisks represent statistically significant differences  
564 between 6-BAP and mock treatments in each time point. \* $P < 0.05$ , \*\* $P < 0.01$ . Values are the  
565 means  $\pm$  SE of two biological replicates ( $n=2$ ). (B) *pTCSn::nls:tGFP* activity in the root tip of

566 non-treated *M. truncatula* transgenic root. The tGFP signal from the nuclei of the root apical  
567 meristem (RAM) and elongation zone (EZ) is shown in green. In magenta, the signal emitted  
568 by cell wall polysaccharides bound to Calcofluor white M2R is shown. (C) *pTCSn::nls:tGFP*  
569 activity at the differentiation zone (DZ) of non-treated transgenic root and (D, E) in DZ of 1  
570  $\mu$ M 6-BAP treated transgenic root after 24 hours in the epidermis (epi) and cortex (co). Scale  
571 bar: 100  $\mu$ m in B, C and 50  $\mu$ m in D, E.

572

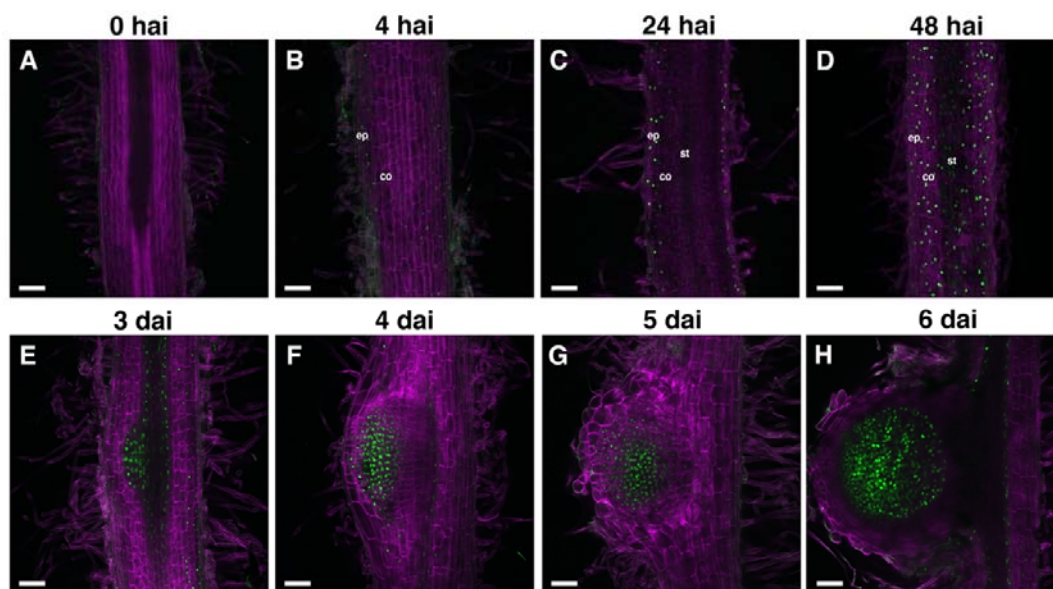

573

574 **Figure 2.** Spatio-temporal activation of cytokinin signaling during indeterminate nodule  
575 development in *M. truncatula*. (A-D) *pTCSn::nls:tGFP* activity (green) and cell walls  
576 (calcofluor white stained, magenta) in the susceptible zone of transgenic root after 0, 4, 24,  
577 and 48 hai with *S. meliloti*. Epidermis (ep), cortex (co) and stele (st). (E-H) *pTCSn::nls:tGFP*  
578 activity during nodule primordium development at (E) stages II/III, (F) stages IV/V, (G) stage  
579 VI and (H) mature nodule. Scale bar: 100 μm.

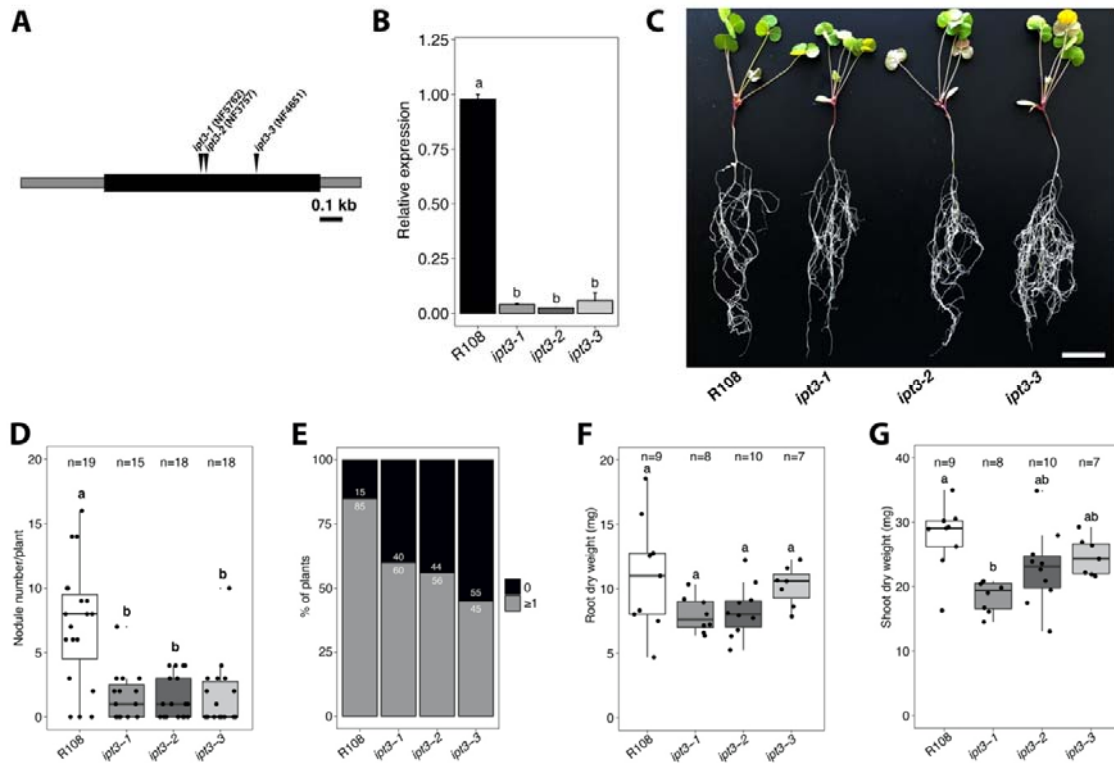

580

581 **Figure 3.** *IPT3* is required for nodule development in *M. truncatula*. (A) Schematic diagram  
582 showing genomic *IPT3* gene structure. NF5762, NF3757, and NF4651 *Tnt1* lines have one  
583 insertion in the unique exon region (black) flanked by 5' and 3' untranslated regions (gray) of  
584 the gene and were renamed *ipt3-1*, *ipt3-2*, and *ipt3-3*, respectively. Black bar, 100 bp. (B)  
585 qRT-PCR analysis of *IPT3* gene expression in R108 genotype and *ipt3* homozygous mutants.  
586 Values indicate means  $\pm$  SE for three biological replicates (n=3). *P* values were calculated  
587 by ANOVA followed by Tukey's posthoc testing. Groups of different significance, at least  
588  $P < 0.05$ , are indicated with different letters. (C) Representative image of 3-week-old R108  
589 and *ipt3* mutant plants after 14 dai of treatment with *S. meliloti* 1021. White bar represents 3  
590 cm. (D) Nodule number in R108 and *ipt3* mutants after 14 dai. Statistical analysis was  
591 performed using ANOVA followed by Tukey's posthoc testing. Groups of different  
592 significance, at least  $P < 0.05$ , are indicated with different letters. (E) Percentage of wild-type  
593 and *ipt3* mutant plants showing 1 or more nodules or none after 14 dai. (F) Root and (G)

594 shoot dry weight measurements of wild-type and *ipt3* mutant plants after 14 dai. Statistical  
595 analysis was performed using ANOVA followed by Tukey's posthoc testing. Groups of  
596 different significance, at least  $P < 0.05$ , are indicated with different letters.

597

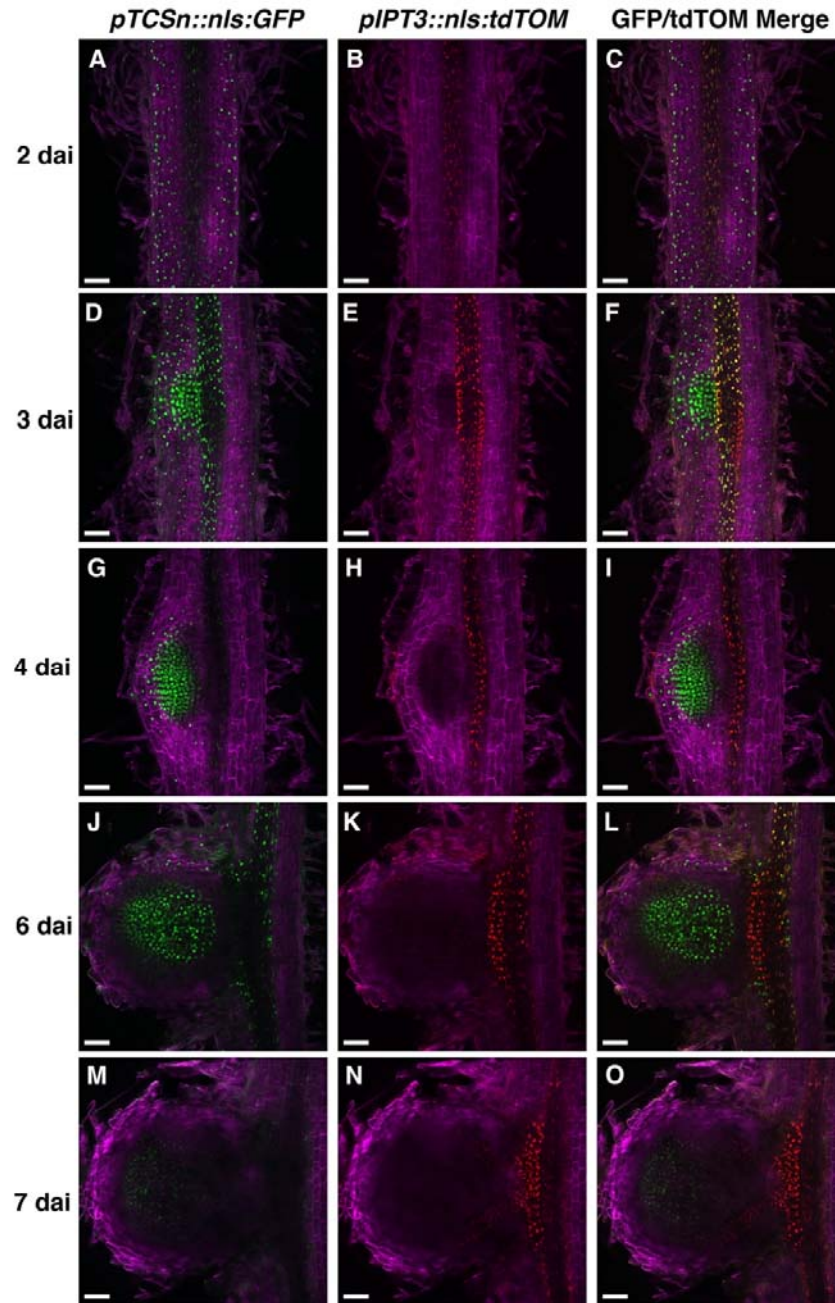

598

599

600 **Figure 4.** *IPT3* expression is induced in the stele at the base of the nodule primordium during  
601 the first cortical cell divisions. (A-C) *pTCSn::nls:tGFP* and *pIPT3::nls:tdTOMATO* activities  
602 in the susceptible zone of transgenic root after 2 dai of *S. meliloti*. (D-I) *pTCSn::nls:tGFP*  
603 and *pIPT3::nls:tdTOMATO* activities in different developmental stages of nodule

604 primordium after 3 (D-F) and 4 dai (G-I). (J-O) *pTCSn::nls:tGFP* and  
605 *pIPT3::nls:tdTOMATO* activities in different developmental stages of mature nodules after 6  
606 (J-L) and 7 dai (M-O). Green and red represent fluorescence signals emitted by tGFP and  
607 tdTOMATO, respectively. The white bar shows 100  $\mu\text{m}$ .  
608

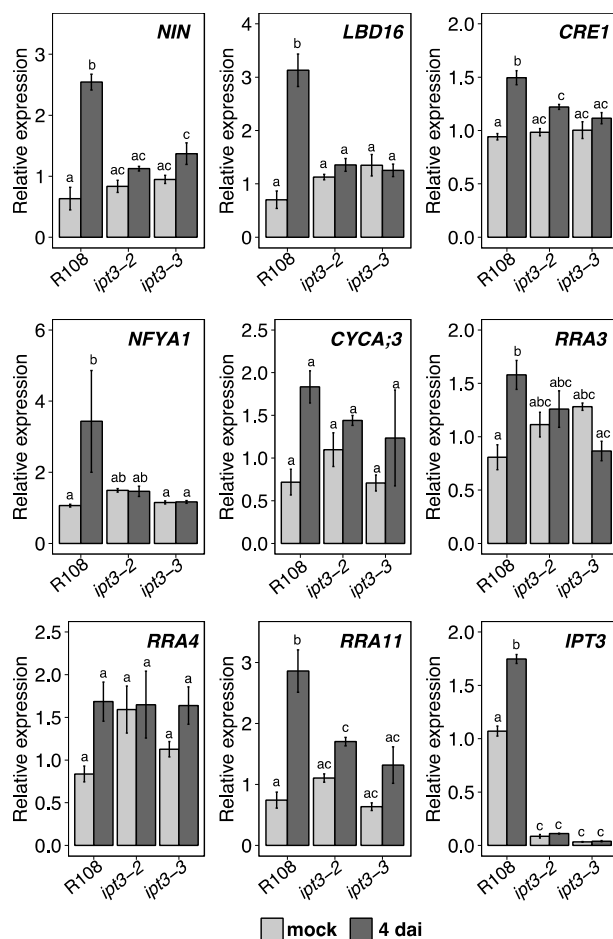

609

610 **Figure 5.** Rhizobia-dependent induction of nodulation regulators and CK signaling genes is  
 611 impaired in *ipt3* loss-of-function mutants. qRT-PCR analyses of nodulation regulators (*NIN*,  
 612 *LBD16*, *NFYA1*) cell cycle (*CYCA;3*) and CK signaling genes (*CRE1*, *RRA3*, *RRA4*, *RRA11*)  
 613 after mock treatment or 4 dai in (A) wild-type, (B) *ipt3-2* and (C) *ipt3-3* mutants. Values are  
 614 the mean of fold-changes of three biological replicates normalized to the untreated wild-type  
 615 value (set as 1) for each gene for all genotypes. Values indicate means  $\pm$  SE of three  
 616 biological replicates (n=3). *P* values were calculated by ANOVA followed by Tukey's  
 617 posthoc testing. Groups of different significance, at least  $P < 0.05$ , are indicated with different  
 618 letters.



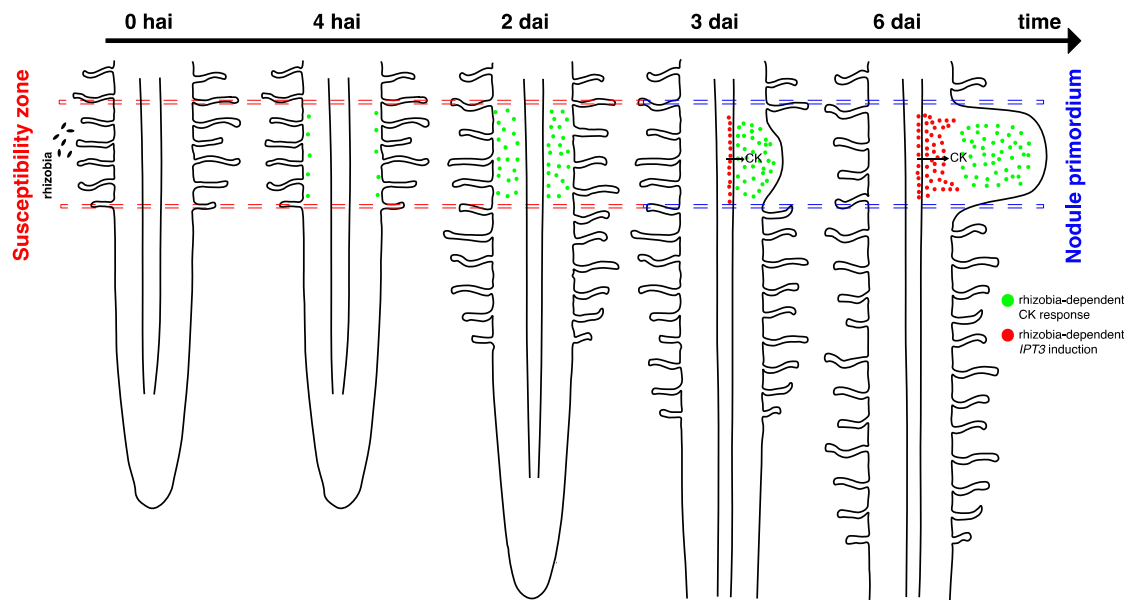

619

620 **Figure 6.** Schematic representation of the spatiotemporal regulation of CK response induced  
621 by rhizobia and the proposed function of IPT3 during indeterminate nodule development in  
622 *M. truncatula*. At 4 hai, CK signaling activation starts in epidermal cells, and progress to the  
623 majority of cortical cell layers within 48 hrs after rhizobia perception. At 3 dai, CK signaling  
624 is activated and localized in dividing cortical cells and *IPT3* expression is induced in the stele  
625 at the base of nodule primordium. At 6 dai, CK response is localized in the central zone of  
626 nodule primordium and *IPT3* is strongly activated and started to propagate from the root stele  
627 to the nodule vasculature.

628



## Parsed Citations

- Ariel F, Brault-Hernandez M, Laffont C, Huault E, Brault M, Plet J, Moison M, Blanchet S, Ichanté JL, Chabaud M, et al (2012) Two Direct Targets of Cytokinin Signaling Regulate Symbiotic Nodulation in *Medicago truncatula*. *Plant Cell* 24: 3838–3852  
Google Scholar: [Author Only](#) [Title Only](#) [Author and Title](#)
- Azarakhsh M, Kirienko AN, Zhukov VA, Lebedeva MA, Dolgikh EA, Lutova LA (2015) KNOTTED1-LIKE HOMEODOMAIN 3: a new regulator of symbiotic nodule development. *EXBOTJ* 66: 7181–7195  
Google Scholar: [Author Only](#) [Title Only](#) [Author and Title](#)
- Azarakhsh M, Lebedeva MA, Lutova LA (2018) Identification and Expression Analysis of *Medicago truncatula* Isopentenyl Transferase Genes (IPTs) Involved in Local and Systemic Control of Nodulation. *Front Plant Sci* 9: 304  
Google Scholar: [Author Only](#) [Title Only](#) [Author and Title](#)
- Azarakhsh M, Rummyantsev AM, Lebedeva MA, Lutova LA (2020) Cytokinin biosynthesis genes expressed during nodule organogenesis are directly regulated by the KNOX3 protein in *Medicago truncatula*. *PLoS ONE* 15: e0232352  
Google Scholar: [Author Only](#) [Title Only](#) [Author and Title](#)
- Boisson-Dernier A, Chabaud M, Garcia F, Bécard G, Rosenberg C, Barker DG (2001) *Agrobacterium rhizogenes* -Transformed Roots of *Medicago truncatula* for the Study of Nitrogen-Fixing and Endomycorrhizal Symbiotic Associations. *MPMI* 14: 695–700  
Google Scholar: [Author Only](#) [Title Only](#) [Author and Title](#)
- Boivin S, Kazmierczak T, Brault M, Wen J, Gamas P, Mysore KS, Frugier F (2016) Different cytokinin histidine kinase receptors regulate nodule initiation as well as later nodule developmental stages in *Medicago truncatula*: Specificity and redundancy of CHKs in nodulation. *Plant, Cell & Environment* 39: 2198–2209  
Google Scholar: [Author Only](#) [Title Only](#) [Author and Title](#)
- Buhian WP, Bensmihen S (2018) Mini-Review: Nod Factor Regulation of Phytohormone Signaling and Homeostasis During Rhizobia-Legume Symbiosis. *Front Plant Sci* 9: 1247  
Google Scholar: [Author Only](#) [Title Only](#) [Author and Title](#)
- Causevic A, Delaunay A, Ounnar S, Riguezza M, Delmotte F, Brignolas F, Hagège D, Maury S (2005) DNA methylating and demethylating treatments modify phenotype and cell wall differentiation state in sugarbeet cell lines. *Plant Physiology and Biochemistry* 43: 681–691  
Google Scholar: [Author Only](#) [Title Only](#) [Author and Title](#)
- Chang S, Puryear J, Cairney J (1993) A simple and efficient method for isolating RNA from pine trees. *Plant Mol Biol Rep* 11: 113–116  
Google Scholar: [Author Only](#) [Title Only](#) [Author and Title](#)
- Chen Y, Chen W, Li X, Jiang H, Wu P, Xia K, Yang Y, Wu G (2014) Knockdown of LjIPT3 influences nodule development in *Lotus japonicus*. *Plant and Cell Physiology* 55: 183–193  
Google Scholar: [Author Only](#) [Title Only](#) [Author and Title](#)
- Cheng X, Wen J, Tadege M, Ratet P, Mysore KS (2011) Reverse Genetics in *Medicago truncatula* Using Tnt1 Insertion Mutants. *Methods in Molecular Biology* 678:179-90.  
Google Scholar: [Author Only](#) [Title Only](#) [Author and Title](#)
- Damiani I, Drain A, Guichard M, Balzergue S, Boscari A, Boyer J-C, Brunaud V, Cottaz S, Rancurel C, Da Rocha M, et al (2016) Nod Factor Effects on Root Hair-Specific Transcriptome of *Medicago truncatula*: Focus on Plasma Membrane Transport Systems and Reactive Oxygen Species Networks. *Front Plant Sci*. doi: 10.3389/fpls.2016.00794  
Google Scholar: [Author Only](#) [Title Only](#) [Author and Title](#)
- Ehrhardt D, Atkinson E, Long (1992) Depolarization of alfalfa root hair membrane potential by *Rhizobium meliloti* Nod factors. *Science* 256: 998–1000  
Google Scholar: [Author Only](#) [Title Only](#) [Author and Title](#)
- Engler C, Youles M, Gruetzner R, Ehnert T-M, Werner S, Jones JDG, Patron NJ, Marillonnet S (2014) A Golden Gate Modular Cloning Toolbox for Plants. *ACS Synth Biol* 3: 839–843  
Google Scholar: [Author Only](#) [Title Only](#) [Author and Title](#)
- Ferguson BJ, Indrasumunar A, Hayashi S, Lin M-H, Lin Y-H, Reid DE, Gresshoff PM (2010) Molecular Analysis of Legume Nodule Development and Autoregulation. *Journal of Integrative Plant Biology* 52: 61–76  
Google Scholar: [Author Only](#) [Title Only](#) [Author and Title](#)
- Ferguson BJ, Mathesius U (2014) Phytohormone Regulation of Legume-Rhizobia Interactions. *J Chem Ecol* 40: 770–790  
Google Scholar: [Author Only](#) [Title Only](#) [Author and Title](#)
- Fisher J, Gaillard P, Fellbaum CR, Subramanian S, Smith S (2018) Quantitative 3D imaging of cell level auxin and cytokinin response ratios in soybean roots and nodules: quantitative imaging of auxin and cytokinin. *Plant Cell Environ*. doi: 10.1111/pce.13169  
Google Scholar: [Author Only](#) [Title Only](#) [Author and Title](#)
- Fonouni-Farde C, Kisiala A, Brault M, Emery RJN, Diet A, Frugier F (2017) DELLA1-Mediated Gibberellin Signaling Regulates Cytokinin-Dependent Symbiotic Nodulation. *Plant Physiol* 175: 1795–1806  
Google Scholar: [Author Only](#) [Title Only](#) [Author and Title](#)

**Gamas P, Brault M, Jardinaud M-F, Frugier F (2017) Cytokinins in Symbiotic Nodulation: When, Where, What For? Trends in Plant Science 22: 792–802**

**Gonzalez-Rizzo S, Crespi M, Frugier F (2006) The Medicago truncatula CRE1 Cytokinin Receptor Regulates Lateral Root Development and Early Symbiotic Interaction with Sinorhizobium meliloti. Plant Cell 18: 2680–2693**

Google Scholar: [Author Only](#) [Title Only](#) [Author and Title](#)

**Heckmann AB, Sandal N, Bek AS, Madsen LH, Jurkiewicz A, Nielsen MW, Tirichine L, Stougaard J (2011) Cytokinin Induction of Root Nodule Primordia in Lotus japonicus Is Regulated by a Mechanism Operating in the Root Cortex. MPMI 24: 1385–1395**

Google Scholar: [Author Only](#) [Title Only](#) [Author and Title](#)

**Held M, Hou H, Miri M, Huynh C, Ross L, Hossain MS, Sato S, Tabata S, Perry J, Wang TL, et al (2014) Lotus japonicus Cytokinin Receptors Work Partially Redundantly to Mediate Nodule Formation. Plant Cell 26: 678–694**

Google Scholar: [Author Only](#) [Title Only](#) [Author and Title](#)

**Hossain MS, Shrestha A, Zhong S, Miri M, Austin RS, Sato S, Ross L, Huebert T, Tromas A, Torres-Jerez I, et al (2016) Lotus japonicus NF-YA1 Plays an Essential Role During Nodule Differentiation and Targets Members of the SH1/STY Gene Family. MPMI 29: 950–964**

Google Scholar: [Author Only](#) [Title Only](#) [Author and Title](#)

**Jardinaud M-F, Boivin S, Rodde N, Catrice O, Kisiala A, Lepage A, Moreau S, Roux B, Cottret L, Sallet E, et al (2016) A Laser Dissection-RNAseq Analysis Highlights the Activation of Cytokinin Pathways by Nod Factors in the Medicago truncatula Root Epidermis. Plant Physiol 171: 2256–2276**

Google Scholar: [Author Only](#) [Title Only](#) [Author and Title](#)

**Jarzyniak K, Banasiak J, Jamruszka T, Pawela A, Di Donato M, Novák O, Geisler M, Jasiński M (2021) Early stages of legume–rhizobia symbiosis are controlled by ABCG-mediated transport of active cytokinins. Nat Plants. doi: 10.1038/s41477-021-00873-6**

Google Scholar: [Author Only](#) [Title Only](#) [Author and Title](#)

**Kieber JJ, Schaller GE (2018) Cytokinin signaling in plant development. Development 145: dev149344**

Google Scholar: [Author Only](#) [Title Only](#) [Author and Title](#)

**Kurakawa T, Ueda N, Maekawa M, Kobayashi K, Kojima M, Nagato Y, Sakakibara H, Kyojuka J (2007) Direct control of shoot meristem activity by a cytokinin-activating enzyme. Nature 445: 652–655**

Google Scholar: [Author Only](#) [Title Only](#) [Author and Title](#)

**Laloum T, Baudin M, Frances L, Lepage A, Billault-Penneteau B, Cerri MR, Ariel F, Jardinaud M-F, Gamas P, de Carvalho-Niebel F, et al (2014) Two CCAAT-box-binding transcription factors redundantly regulate early steps of the legume-rhizobia endosymbiosis. Plant J 79: 757–768**

Google Scholar: [Author Only](#) [Title Only](#) [Author and Title](#)

**Laporte P, Lepage A, Fournier J, Catrice O, Moreau S, Jardinaud M-F, Mun J-H, Larrainzar E, Cook DR, Gamas P, et al (2014) The CCAAT box-binding transcription factor NF-YA1 controls rhizobial infection. EXBOTJ 65: 481–494**

Google Scholar: [Author Only](#) [Title Only](#) [Author and Title](#)

**Liu C-W, Breakspear A, Roy S, Murray JD (2015) Cytokinin responses counterpoint auxin signaling during rhizobial infection. Plant Signaling & Behavior 10: e1019982**

Google Scholar: [Author Only](#) [Title Only](#) [Author and Title](#)

**Madsen LH, Tirichine L, Jurkiewicz A, Sullivan JT, Heckmann AB, Bek AS, Ronson CW, James EK, Stougaard J (2010) The molecular network governing nodule organogenesis and infection in the model legume Lotus japonicus. Nat Commun 1: 10**

Google Scholar: [Author Only](#) [Title Only](#) [Author and Title](#)

**Mortier V, Wasson A, Jaworek P, De Keyser A, Decroos M, Holsters M, Tarkowski P, Mathesius U, Goormachtig S (2014) Role of LONELY GUY genes in indeterminate nodulation on Medicago truncatula. New Phytol 202: 582–593**

Google Scholar: [Author Only](#) [Title Only](#) [Author and Title](#)

**Op den Camp RHM, De Mita S, Lillo A, Cao Q, Limpens E, Bisseling T, Geurts R (2011) A Phylogenetic Strategy Based on a Legume-Specific Whole Genome Duplication Yields Symbiotic Cytokinin Type-A Response Regulators. Plant Physiol 157: 2013–2022**

Google Scholar: [Author Only](#) [Title Only](#) [Author and Title](#)

**Ovchinnikova E, Journet E-P, Chabaud M, Cosson V, Ratet P, Duc G, Fedorova E, Liu W, den Camp RO, Zhukov V, et al (2011) IPD3 Controls the Formation of Nitrogen-Fixing Symbiosomes in Pea and Medicago Spp. MPMI 24: 1333–1344**

Google Scholar: [Author Only](#) [Title Only](#) [Author and Title](#)

**Plet J, Wasson A, Ariel F, Le Signor C, Baker D, Mathesius U, Crespi M, Frugier F (2011) MtCRE1-dependent cytokinin signaling integrates bacterial and plant cues to coordinate symbiotic nodule organogenesis in Medicago truncatula: Hormonal interactions in nodulation. The Plant Journal 65: 622–633**

Google Scholar: [Author Only](#) [Title Only](#) [Author and Title](#)

**Reid D, Nadziejka M, Novák O, Heckmann AB, Sandal N, Stougaard J (2017) Cytokinin Biosynthesis Promotes Cortical Cell Responses during Nodule Development. Plant Physiol 175: 361–375**

Google Scholar: [Author Only](#) [Title Only](#) [Author and Title](#)

Roy S, Liu W, Nandety RS, Crook A, Mysore KS, Pislariu CI, Frugoli J, Dickstein R, Udvardi MK (2020) Celebrating 20 Years of Genetic Discoveries in Legume Nodulation and Symbiotic Nitrogen Fixation. *Plant Cell* 32: 15–41

Google Scholar: [Author Only](#) [Title Only](#) [Author and Title](#)

Sakakibara H (2006) CYTOKININS: Activity, Biosynthesis, and Translocation. *Annu Rev Plant Biol* 57: 431–449

Google Scholar: [Author Only](#) [Title Only](#) [Author and Title](#)

Sasaki T, Suzaki T, Soyano T, Kojima M, Sakakibara H, Kawaguchi M (2014) Shoot-derived cytokinins systemically regulate root nodulation. *Nat Commun* 5: 4983

Google Scholar: [Author Only](#) [Title Only](#) [Author and Title](#)

Schiessl K, Lilley JLS, Lee T, Tamvakis I, Kohlen W, Bailey PC, Thomas A, Luptak J, Ramakrishnan K, Carpenter MD, et al (2019) NODULE INCEPTION Recruits the Lateral Root Developmental Program for Symbiotic Nodule Organogenesis in *Medicago truncatula*. *Current Biology* 29: 3657-3668.e5

Google Scholar: [Author Only](#) [Title Only](#) [Author and Title](#)

Shrestha A, Zhong S, Therrien J, Huebert T, Sato S, Mun T, Andersen SU, Stougaard J, Lepage A, Niebel A, et al (2021) Lotus japonicus Nuclear Factor YA1, a nodule emergence stage-specific regulator of auxin signalling. *New Phytol* 229: 1535–1552

Google Scholar: [Author Only](#) [Title Only](#) [Author and Title](#)

Soyano T, Kouchi H, Hirota A, Hayashi M (2013) NODULE INCEPTION Directly Targets NF-Y Subunit Genes to Regulate Essential Processes of Root Nodule Development in *Lotus japonicus*. *PLoS Genet* 9: e1003352

Google Scholar: [Author Only](#) [Title Only](#) [Author and Title](#)

Tadege M, Wen J, He J, Tu H, Kwak Y, Eschstruth A, Cayrel A, Endre G, Zhao PX, Chabaud M, et al (2008) Large-scale insertional mutagenesis using the Tnt1 retrotransposon in the model legume *Medicago truncatula*. *Plant J* 54: 335–347

Google Scholar: [Author Only](#) [Title Only](#) [Author and Title](#)

Tirichine L, Sandal N, Madsen LH, Radutoiu S, Albrektsen AS, Sato S, Asamizu E, Tabata S, Stougaard J (2007) A Gain-of-Function Mutation in a Cytokinin Receptor Triggers Spontaneous Root Nodule Organogenesis. *Science* 315: 104–107

Google Scholar: [Author Only](#) [Title Only](#) [Author and Title](#)

Turner M, Nizampatnam NR, Baron M, Coppin S, Damodaran S, Adhikari S, Arunachalam SP, Yu O, Subramanian S (2013) Ectopic Expression of miR160 Results in Auxin Hypersensitivity, Cytokinin Hyposensitivity, and Inhibition of Symbiotic Nodule Development in Soybean. *Plant Physiol* 162: 2042–2055

Google Scholar: [Author Only](#) [Title Only](#) [Author and Title](#)

van Zeijl A, Op den Camp RHM, Deinum EE, Charnikhova T, Franssen H, Op den Camp HJM, Bouwmeester H, Kohlen W, Bisseling T, Geurts R (2015) Rhizobium Lipo-chitooligosaccharide Signaling Triggers Accumulation of Cytokinins in *Medicago truncatula* Roots. *Molecular Plant* 8: 1213–1226

Google Scholar: [Author Only](#) [Title Only](#) [Author and Title](#)

Vernié T, Kim J, Frances L, Ding Y, Sun J, Guan D, Niebel A, Gifford ML, de Carvalho-Niebel F, Oldroyd GED (2015) The NIN Transcription Factor Coordinates Diverse Nodulation Programs in Different Tissues of the *Medicago truncatula* Root. *Plant Cell* 27: 3410–3424

Google Scholar: [Author Only](#) [Title Only](#) [Author and Title](#)

Xiao TT, Schilderink S, Moling S, Deinum EE, Kondorosi E, Franssen H, Kulikova O, Niebel A, Bisseling T (2014) Fate map of *Medicago truncatula* root nodules. *Development* 141: 3517–3528

Google Scholar: [Author Only](#) [Title Only](#) [Author and Title](#)

Zürcher E, Tavor-Deslex D, Lituiev D, Enkerli K, Tarr PT, Müller B (2013) A Robust and Sensitive Synthetic Sensor to Monitor the Transcriptional Output of the Cytokinin Signaling Network in Planta. *Plant Physiol* 161: 1066–1075

Google Scholar: [Author Only](#) [Title Only](#) [Author and Title](#)
